# Supplementary material
Source: publisher site journal article supplement (https://www.dovepress.com/article/407525)
Supplement: Supplementary file 1 [file get_supplementary_file.php]

**Table S1** Mutations in *katG*, *ethA*, *inhA* promoter region, *inhA*, *ethR*, *ahpC* and its upstream region, *mshA* and *ndh* genes in 213 INHSETHS *Mycobacterium tuberculosis* clinical isolates.

| **Drug Resistance** | | **No. of isolates** | **Resistance genotype** | | | | | | | |
| --- | --- | --- | --- | --- | --- | --- | --- | --- | --- | --- |
| ***katG*** | ***ethA*** | ***inhA* promoter** | ***inhA*** | ***ethR*** | ***ahpC* and its upstream** | ***mshA*** | ***ndh*** |
| **INHS** | **ETHS** | 1 | W91R, S140G | WT | WT | WT | WT | WT | WT | WT |
|  |  | 1 | M105I | S266R | WT | WT | WT | WT | WT | WT |
|  |  | 1 | A139P | S266R | WT | WT | WT | WT | WT | WT |
|  |  | 1 | K143T* | WT | WT | WT | WT | WT | WT | WT |
|  |  | 1 | D189G | WT | WT | WT | WT | WT | WT | WT |
|  |  | 2 | W191G | 740delC* | WT | WT | WT | WT | WT | WT |
|  |  | 1 | S315T | WT | WT | WT | WT | WT | WT | WT |
|  |  | 1 | S315T | WT | WT | WT | WT | -57C>T | WT | WT |
|  |  | 1 | S315T, K590E | WT | WT | WT | WT | WT | WT | WT |
|  |  | 1 | T394A | WT | WT | WT | WT | -52C>T | WT | WT |
|  |  | 1 | C401Ca | WT | WT | WT | WT | WT | WT | WT |
|  |  | 1 | R498H | WT | WT | WT | F110L | -54C>T | WT | WT |
|  |  | 1 | D513E* | WT | WT | WT | WT | -75T>G* | WT | WT |
|  |  | 1 | L619R | WT | WT | A211T* | WT | -57C>T | WT | WT |
|  |  | 1 | S620Sa | WT | WT | WT | WT | WT | WT | WT |
|  |  | 1 | G630V | WT | WT | WT | WT | -52C>T | WT | WT |
|  |  | 1 | Y711D | P334A | WT | WT | WT | WT | WT | WT |
|  |  | 1 | 252dupG | WT | WT | WT | WT | WT | WT | WT |
|  |  | 1 | WT | I34T | WT | WT | WT | WT | WT | WT |
|  |  | 1 | WT | I34T, L268T* | WT | WT | WT | WT | WT | WT |
|  |  | 1 | WT | S266R | WT | WT | WT | V26A* | WT | WT |
|  |  | 1 | WT | S266R | WT | WT | WT | F94C* | WT | WT |
|  |  | 3 | WT | S266R | WT | WT | WT | WT | R413W | WT |
|  |  | 25 | WT | S266R | WT | WT | WT | WT | WT | WT |
|  |  | 5 | WT | P334A | WT | WT | WT | WT | WT | WT |
|  |  | 1 | WT | C403Ca | -124G>A* | WT | R19P* | WT | WT | WT |
|  |  | 2 | WT | WT | -301A>G* | WT | WT | WT | WT | WT |
|  |  | 7 | WT | WT | WT | G3Ga | WT | WT | WT | WT |
|  |  | 1 | WT | WT | WT | T162A | WT | WT | WT | WT |
|  |  | 1 | WT | WT | WT | WT | A33T*, A161T* | WT | WT | WT |
|  |  | 1 | WT | WT | WT | WT | A161T* | WT | WT | WT |
|  |  | 2 | WT | WT | WT | WT | D201N* | WT | WT | WT |
|  |  | 1 | WT | WT | WT | WT | WT | -254_253delCA* | WT | WT |
|  |  | 1 | WT | WT | WT | WT | WT | 469_470delAA* | WT | WT |
|  |  | 1 | WT | WT | WT | WT | WT | WT | V103Va | WT |
|  |  | 1 | WT | WT | WT | WT | WT | WT | A187T* | WT |
|  |  | 1 | WT | WT | WT | WT | WT | WT | G192Ga | WT |
|  |  | 1 | WT | WT | WT | WT | WT | WT | P368L* | WT |
|  |  | 1 | WT | WT | WT | WT | WT | WT | WT | K208Ka |
|  |  | 135 | WT | WT | WT | WT | WT | WT | WT | WT |

**Notes:**

**Abbreviations:** Ethionamide, ETH, Ethionamide; ETHS, Ethionamide susceptible; ETHR, Ethionamide resistant; INH, isoniazid; INHS, isoniazid susceptible; INHR, isoniazid resistant; R, resistant; S, susceptible; WT, wild-type.

* Novel mutations in *katG*, *ethA*, *inhA* promoter region, *inhA*, *ethR*, *ahpC* and its upstream region, *mshA* and *ndh* genes.

a These synonymous mutations were not analyzed as isoniazid or ethionamide resistance associated mutations.
